# Supplementary material
Source: publisher figshare collection journal article supplement (https://frontiersin.figshare.com/ndownloader/files/12358598)
Supplement: Supplementary file [file 12358598]

## *Supplementary Material*

### The interplay of Notch signaling and STAT3 in TLR-activated human primary monocytes

**Dagmar Hildebrand<sup>1\*</sup>, Florian Uhle<sup>2</sup>, Delal Sahin<sup>1</sup>, Ute Krauser<sup>2</sup>, Markus Alexander Weigand<sup>2</sup>, Klaus Heeg<sup>1</sup>**

<sup>1</sup>Medical Microbiology and Hygiene, Centre for Infectious Diseases, Heidelberg University Hospital, Heidelberg, Germany

<sup>2</sup>Department of Anesthesiology, Heidelberg University Hospital, Heidelberg, Germany

**\*Correspondence:**

Dagmar Hildebrand: [dagmar.hildebrand@med.uni-heidelberg.de](mailto:dagmar.hildebrand@med.uni-heidelberg.de)

#### Supplementary Figures

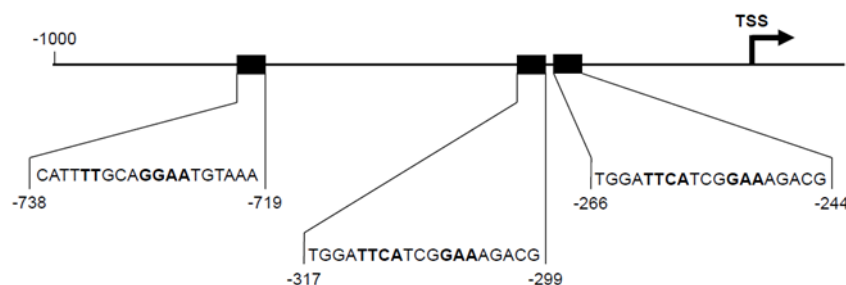

**Supplementary Figure 1. STAT3 binding sites in the promoter region of DLL1.**

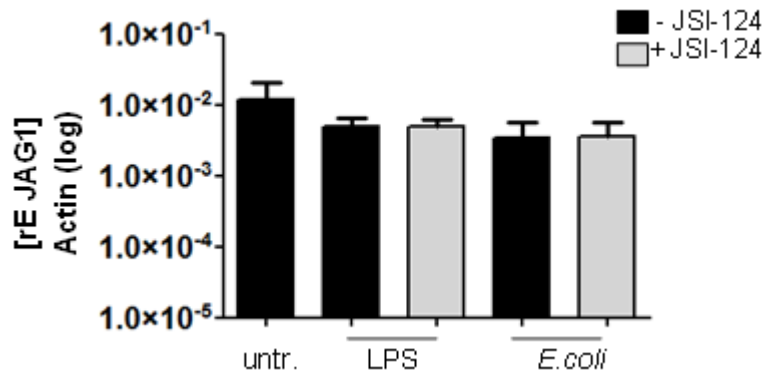

**Supplementary Figure 2. STAT3-independent induction of LPS-stimulated JAG1.** Human blood-derived monocytes were pretreated with STAT3 Inhibitor JSI-124 (200nM) for two hours before stimulation with LPS (100ng/ml) or infection with *E. coli* ( $10^6$  bacteria per  $10^6$  monocytes/ml). After two hours bacteria were killed by gentamicin. RNA was isolated and cDNA produced. Induction of gene expression was analyzed by qRT PCR using a sequence-specific primer for JAG-1 (gene encoding Jagged-1) and SYBR Green Master mix. Actin was detected as endogenous control for normalization.
